# Supplementary material
Source: PubMed Central journal article supplement (PMC7489388)
Supplement: jamaophthalmol-e203269-s001.pdf [file jamaophthalmol-e203269-s001.pdf]

## Supplementary Online Content

Burlina P, Paul W, Mathew P, Joshi N, Pacheco KD, Bressler NM. Low-shot deep learning of diabetic retinopathy with potential applications to address artificial intelligence bias in retinal diagnostics and rare ophthalmic diseases. *JAMA Ophthalmol*. Published online September 3, 2020. doi:10.1001/jamaophthalmol.2020.3269

**eTable 1.** Performance of Algorithms: Accuracy

**eTable 2.** Performance of Algorithms: ROC AUC

**eTable 3.** Performance of Algorithms: F1 Score

**eFigure 1.** Accuracy for All Methods and Number of Shots

**eFigure 2.** Accuracy and Confidence Intervals for All Shots

**eFigure 3.** ROC AUC for All Shots

**eFigure 4.** ROC AUC for All Shots with 95% Confidence Intervals

**eFigure 5.** F1 Score for All Shots

**eFigure 6.** N=10 Shots Results: ROCs and Confidence Intervals, All, Two-Curve Comparisons of Methods

**eFigure 7.** N=40 Shots Results: ROCs and Confidence Intervals, All Methods, Two by Two Comparison of Methods

**eFigure 8.** N=160 Shots Results: ROCs and Confidence Intervals, All Methods, Two by Two Comparison of Methods

**eFigure 9.** N=5120 Shots Results: ROCs and Confidence Intervals, All Methods, Two by Two Comparison of Methods

**eFigure 10.** N=10 Shots Results: PR Curves and Confidence Intervals, All Methods, Two by Two Comparison of Methods

**eFigure 11.** N=40 Shots Results: PR Curves and Confidence Intervals, All Methods, Two by Two Comparison of Methods

**eFigure 12.** N=160 Shots Results: PR Curves and Confidence Intervals, All Methods, Two by Two Comparison of Methods

**eFigure 13.** N=5120 Shots Results: PR Curves and Confidence Intervals, All Methods, Two by Two Comparison of Methods

This supplementary material has been provided by the authors to give readers additional information about their work.

**eTable 1.** Performance of Algorithms: Accuracy

| Number of Samples | 10                                           | 20                                           | 40                                           | 79                                           | 160                                          | 320                                          | 639                                          | 1280                                         | 2560                                         | 5120                                         |
|-------------------|----------------------------------------------|----------------------------------------------|----------------------------------------------|----------------------------------------------|----------------------------------------------|----------------------------------------------|----------------------------------------------|----------------------------------------------|----------------------------------------------|----------------------------------------------|
| <b>RES_FT</b>     | 51.47%<br>[49.14%,<br>53.80%]                | 49.21%<br>[46.88%,<br>51.54%]                | 54.93%<br>[52.61%,<br>57.25%]                | 56.85%<br>[54.54%,<br>59.16%]                | 59.85%<br>[57.56%,<br>62.14%]                | 62.74%<br>[60.48%,<br>65.00%]                | 67.44%<br>[65.25%,<br>69.63%]                | 72.65%<br>[70.57%,<br>74.73%]                | 73.33%<br>[71.27%,<br>75.39%]                | 74.29%<br>[72.25%,<br>76.33%]                |
| <b>RES_KNN</b>    | 50.23%<br>[47.90%,<br>52.56%]                | 51.25%<br>[48.92%,<br>53.58%]                | 51.47%<br>[49.14%,<br>53.80%]                | 56.34%<br>[54.03%,<br>58.65%]                | 58.61%<br>[56.31%,<br>60.91%]                | 59.80%<br>[57.51%,<br>62.09%]                | 61.44%<br>[59.17%,<br>63.71%]                | 60.65%<br>[58.37%,<br>62.93%]                | 61.10%<br>[58.83%,<br>63.37%]                | 61.04%<br>[58.77%,<br>63.31%]                |
| <b>RES_SVM</b>    | 50.45%<br>[48.12%,<br>52.78%]                | 53.34%<br>[51.01%,<br>55.67%]                | 55.04%<br>[52.72%,<br>57.36%]                | 54.93%<br>[52.61%,<br>57.25%]                | 63.19%<br>[60.94%,<br>65.44%]                | 65.35%<br>[63.13%,<br>67.57%]                | 68.52%<br>[66.35%,<br>70.69%]                | 69.37%<br>[67.22%,<br>71.52%]                | 71.74%<br>[69.64%,<br>73.84%]                | 73.16%<br>[71.09%,<br>75.23%]                |
| <b>RES_RF</b>     | 50.91%<br>[48.58%,<br>53.24%]                | 54.42%<br>[52.10%,<br>56.74%]                | 57.36%<br>[55.05%,<br>59.67%]                | 58.10%<br>[55.80%,<br>60.40%]                | 63.08%<br>[60.83%,<br>65.33%]                | 62.85%<br>[60.60%,<br>65.10%]                | 66.65%<br>[64.45%,<br>68.85%]                | 68.18%<br>[66.01%,<br>70.35%]                | 68.97%<br>[66.81%,<br>71.13%]                | 69.20%<br>[67.05%,<br>71.35%]                |
| <b>DIM</b>        | <b>55.95%</b><br><b>[53.63%,<br/>58.27%]</b> | 56.12%<br>[53.81%,<br>58.43%]                | <b>62.74%</b><br><b>[60.48%,<br/>65.00%]</b> | 64.04%<br>[61.80%,<br>66.28%]                | 65.23%<br>[63.01%,<br>67.45%]                | 66.99%<br>[64.80%,<br>69.18%]                | 72.14%<br>[70.05%,<br>74.23%]                | 69.31%<br>[67.16%,<br>71.46%]                | 71.69%<br>[69.59%,<br>73.79%]                | 75.71%<br>[73.71%,<br>77.71%]                |
| <b>DIM_KNN</b>    | 52.10%<br>[49.77%,<br>54.43%]                | 52.15%<br>[49.82%,<br>54.48%]                | 54.59%<br>[52.27%,<br>56.91%]                | 57.30%<br>[54.99%,<br>59.61%]                | 59.34%<br>[57.05%,<br>61.63%]                | 60.25%<br>[57.97%,<br>62.53%]                | 63.82%<br>[61.58%,<br>66.06%]                | 61.10%<br>[58.83%,<br>63.37%]                | 63.02%<br>[60.77%,<br>65.27%]                | 64.33%<br>[62.10%,<br>66.56%]                |
| <b>DIM_SVM</b>    | 54.53%<br>[52.21%,<br>56.85%]                | 57.36%<br>[55.05%,<br>59.67%]                | 62.06%<br>[59.80%,<br>64.32%]                | <b>64.27%</b><br><b>[62.03%,<br/>66.51%]</b> | <b>67.04%</b><br><b>[64.85%,<br/>69.23%]</b> | <b>70.72%</b><br><b>[68.60%,<br/>72.84%]</b> | <b>73.16%</b><br><b>[71.09%,<br/>75.23%]</b> | <b>74.29%</b><br><b>[72.25%,<br/>76.33%]</b> | <b>75.65%</b><br><b>[73.65%,<br/>77.65%]</b> | <b>76.39%</b><br><b>[74.41%,<br/>78.37%]</b> |
| <b>DIM_RF</b>     | 55.72%<br>[53.40%,<br>58.04%]                | <b>57.81%</b><br><b>[55.51%,<br/>60.11%]</b> | 59.12%<br>[56.83%,<br>61.41%]                | 62.80%<br>[60.55%,<br>65.05%]                | 63.14%<br>[60.89%,<br>65.39%]                | 68.01%<br>[65.83%,<br>70.19%]                | 69.59%<br>[67.44%,<br>71.74%]                | 69.37%<br>[67.22%,<br>71.52%]                | 70.84%<br>[68.72%,<br>72.96%]                | 71.06%<br>[68.94%,<br>73.18%]                |

Accuracy shown in %, along with 95% CI (brackets). Best results are bold-faced. Rows compare various algorithms including: (top) a traditional fine-tuned ResNet (denoted as RES\_FT), which is compared to other-low shot deep learning (LSDL) algorithms, shown in the bottom half of the table. These LSDL algorithms include: ResNet encoding fed into a random forest or SVM classifier (denoted as RES\_RF and RES\_SVM). Augmented

Multiscale Deep InfoMax (AMDIM) encoding [Bachman2019] yielding local and global features, fed to a classifier, consisting of either ResNet (using only local features, and denoted as DIM), and three other classifiers using the global features of DIM and either K Nearest Neighbors (DIM-KNN), Support Vector Machine (DIM\_SVM), or Random Forest (DIM\_RF). We show performance for values of N (numbers of samples per class) ranging from a minimum of N=10 to a maximum of N=5120. As seen in the table, the low-shot deep learning methods using DIM outperform the traditional fine-tuned ResNet method.

**eTable 2.** Performance of Algorithms: ROC AUC

| Number of Samples | 10                                       | 20                                       | 40                                       | 79                                       | 160                                      | 320                                      | 639                                      | 1280                                     | 2560                                     | 5120                                     |
|-------------------|------------------------------------------|------------------------------------------|------------------------------------------|------------------------------------------|------------------------------------------|------------------------------------------|------------------------------------------|------------------------------------------|------------------------------------------|------------------------------------------|
| RES_FT            | 0.5178<br>[0.4909, 0.5447]               | 0.4799<br>[0.4530, 0.5068]               | 0.5671<br>[0.5404, 0.5938]               | 0.5859<br>[0.5594, 0.6124]               | 0.6585<br>[0.6332, 0.6838]               | 0.6624<br>[0.6372, 0.6876]               | 0.7441<br>[0.7212, 0.7670]               | 0.8028<br>[0.7823, 0.8233]               | 0.8089<br>[0.7887, 0.8291]               | 0.8330<br>[0.8140, 0.8520]               |
| RES_KNN           | 0.5076<br>[0.4807, 0.5345]               | 0.5234<br>[0.4965, 0.5503]               | 0.5221<br>[0.4952, 0.5490]               | 0.5778<br>[0.5512, 0.6044]               | 0.6148<br>[0.5887, 0.6409]               | 0.6327<br>[0.6069, 0.6585]               | 0.6516<br>[0.6262, 0.6770]               | 0.6401<br>[0.6145, 0.6657]               | 0.6419<br>[0.6163, 0.6675]               | 0.6549<br>[0.6296, 0.6802]               |
| RES_SVM           | 0.4992<br>[0.4722, 0.5262]               | 0.5657<br>[0.5390, 0.5924]               | 0.5912<br>[0.5648, 0.6176]               | 0.5944<br>[0.5680, 0.6208]               | 0.6787<br>[0.6539, 0.7035]               | 0.7089<br>[0.6849, 0.7329]               | 0.7595<br>[0.7372, 0.7818]               | 0.7782<br>[0.7566, 0.7998]               | 0.7971<br>[0.7763, 0.8179]               | 0.8078<br>[0.7875, 0.8281]               |
| RES_RF            | 0.5055<br>[0.4786, 0.5324]               | 0.5639<br>[0.5372, 0.5906]               | 0.5940<br>[0.5676, 0.6204]               | 0.6238<br>[0.5979, 0.6497]               | 0.6742<br>[0.6493, 0.6991]               | 0.6900<br>[0.6655, 0.7145]               | 0.7235<br>[0.6999, 0.7471]               | 0.7451<br>[0.7223, 0.7679]               | 0.7483<br>[0.7256, 0.7710]               | 0.7564<br>[0.7340, 0.7788]               |
| DIM               | <b>0.5778</b><br><b>[0.5512, 0.6044]</b> | <b>0.6427</b><br><b>[0.6171, 0.6683]</b> | <b>0.6760</b><br><b>[0.6511, 0.7009]</b> | 0.6746<br>[0.6497, 0.6995]               | <b>0.7467</b><br><b>[0.7239, 0.7695]</b> | 0.7351<br>[0.7119, 0.7583]               | 0.7794<br>[0.7579, 0.8009]               | 0.7559<br>[0.7335, 0.7783]               | 0.7846<br>[0.7633, 0.8059]               | 0.8348<br>[0.8159, 0.8537]               |
| DIM_KNN           | 0.5248<br>[0.4979, 0.5517]               | 0.5267<br>[0.4998, 0.5536]               | 0.5625<br>[0.5358, 0.5892]               | 0.5898<br>[0.5634, 0.6162]               | 0.6134<br>[0.5873, 0.6395]               | 0.6481<br>[0.6226, 0.6736]               | 0.6770<br>[0.6522, 0.7018]               | 0.6527<br>[0.6273, 0.6781]               | 0.6690<br>[0.6440, 0.6940]               | 0.6884<br>[0.6638, 0.7130]               |
| DIM_SVM           | 0.5440<br>[0.5172, 0.5708]               | 0.6027<br>[0.5764, 0.6290]               | 0.6525<br>[0.6271, 0.6779]               | <b>0.7040</b><br><b>[0.6799, 0.7281]</b> | 0.7455<br>[0.7227, 0.7683]               | <b>0.7903</b><br><b>[0.7692, 0.8114]</b> | <b>0.8114</b><br><b>[0.7913, 0.8315]</b> | <b>0.8276</b><br><b>[0.8083, 0.8469]</b> | <b>0.8479</b><br><b>[0.8297, 0.8661]</b> | <b>0.8581</b><br><b>[0.8405, 0.8757]</b> |
| DIM_RF            | 0.5706<br>[0.5440, 0.5972]               | 0.6061<br>[0.5799, 0.6323]               | 0.6234<br>[0.5975, 0.6493]               | 0.6751<br>[0.6502, 0.7000]               | 0.7039<br>[0.6798, 0.7280]               | 0.7495<br>[0.7268, 0.7722]               | 0.7729<br>[0.7511, 0.7947]               | 0.7748<br>[0.7531, 0.7965]               | 0.7769<br>[0.7553, 0.7985]               | 0.7985<br>[0.7778, 0.8192]               |

ROC AUC, along with 95% CI (brackets). Best results are bold-faced. Rows compare

various algorithms including: (top) a traditional fine-tuned ResNet (denoted as RES\_FT), which is compared to other low-shot deep learning (LSDL) algorithms, shown in the bottom half of the table. These LSDL algorithms include: ResNet encoding fed into a random forest or SVM classifier (denoted as RES\_RF and RES\_SVM). Augmented Multiscale Deep InfoMax (AMDIM) encoding [Bachman2019] yielding local and global features, fed to a classifier, consisting of either ResNet (using only local features, and denoted as DIM), and three other classifiers using the global features of DIM and either K Nearest Neighbors (DIM-KNN), Support Vector Machine (DIM\_SVM), or Random Forest (DIM\_RF). We show performance for values of N (numbers of samples per class) ranging from a minimum of N=10 to a maximum of N=5120. As seen in the table, the low-shot deep learning methods using DIM outperform the traditional fine-tuned ResNet method.

**eTable 3.** Performance of Algorithms: F1 Score

| Number of Samples | 10            | 20            | 40            | 79            | 160           | 320           | 639           | 1280          | 2560          | 5120          |
|-------------------|---------------|---------------|---------------|---------------|---------------|---------------|---------------|---------------|---------------|---------------|
| RES_FT            | 0.5648        | 0.5221        | 0.4865        | 0.4844        | 0.4925        | 0.5760        | 0.6991        | 0.7085        | 0.7201        | 0.7291        |
| RES_KNN           | 0.5536        | 0.5176        | 0.5263        | 0.5830        | 0.5863        | 0.5984        | 0.6025        | 0.5962        | 0.5803        | 0.5870        |
| RES_SVM           | 0.6067        | 0.5517        | 0.5340        | 0.5646        | 0.5812        | 0.6136        | 0.6323        | 0.6530        | 0.6799        | 0.7011        |
| RES_RF            | 0.5893        | 0.5725        | 0.5962        | 0.5969        | 0.6414        | 0.6372        | 0.6525        | 0.6698        | 0.6780        | 0.6739        |
| DIM               | 0.6381        | <b>0.6599</b> | 0.5846        | 0.5984        | <b>0.7022</b> | 0.6791        | 0.7113        | 0.6095        | 0.7076        | 0.7360        |
| DIM_KNN           | 0.5447        | 0.5503        | 0.5674        | 0.5769        | 0.5864        | 0.5970        | 0.6120        | 0.5844        | 0.5926        | 0.6082        |
| DIM_SVM           | <b>0.6513</b> | 0.5558        | 0.6086        | <b>0.6363</b> | 0.6600        | <b>0.6899</b> | <b>0.7145</b> | <b>0.7265</b> | <b>0.7346</b> | <b>0.7446</b> |
| DIM_RF            | 0.5660        | 0.5666        | <b>0.6316</b> | 0.6319        | 0.6498        | 0.6866        | 0.6951        | 0.6871        | 0.7014        | 0.6985        |

F1 score. Best results are bold-faced. Rows compare various algorithms including: (top) a traditional fine-tuned ResNet (denoted as RES\_FT), which is compared to other low-shot deep learning (LSDL) algorithms, shown in the bottom half of the table. These LSDL algorithms include: ResNet encoding fed into a random forest or SVM classifier (denoted as RES\_RF and RES\_SVM). Augmented Multiscale Deep InfoMax (AMDIM) encoding [Bachman2019] yielding local and global features, fed to a classifier, consisting of either ResNet (using only local features, and denoted as DIM), and three other classifiers using the global features of DIM and either K Nearest Neighbors (DIM-KNN), Support Vector Machine (DIM\_SVM), or Random Forest (DIM\_RF). We show performance for values of N (numbers of samples per class) ranging from a minimum of N=10 to a maximum of N=5120. As seen in the table, the low-shot deep learning methods using DIM outperform the traditional fine-tuned ResNet method.

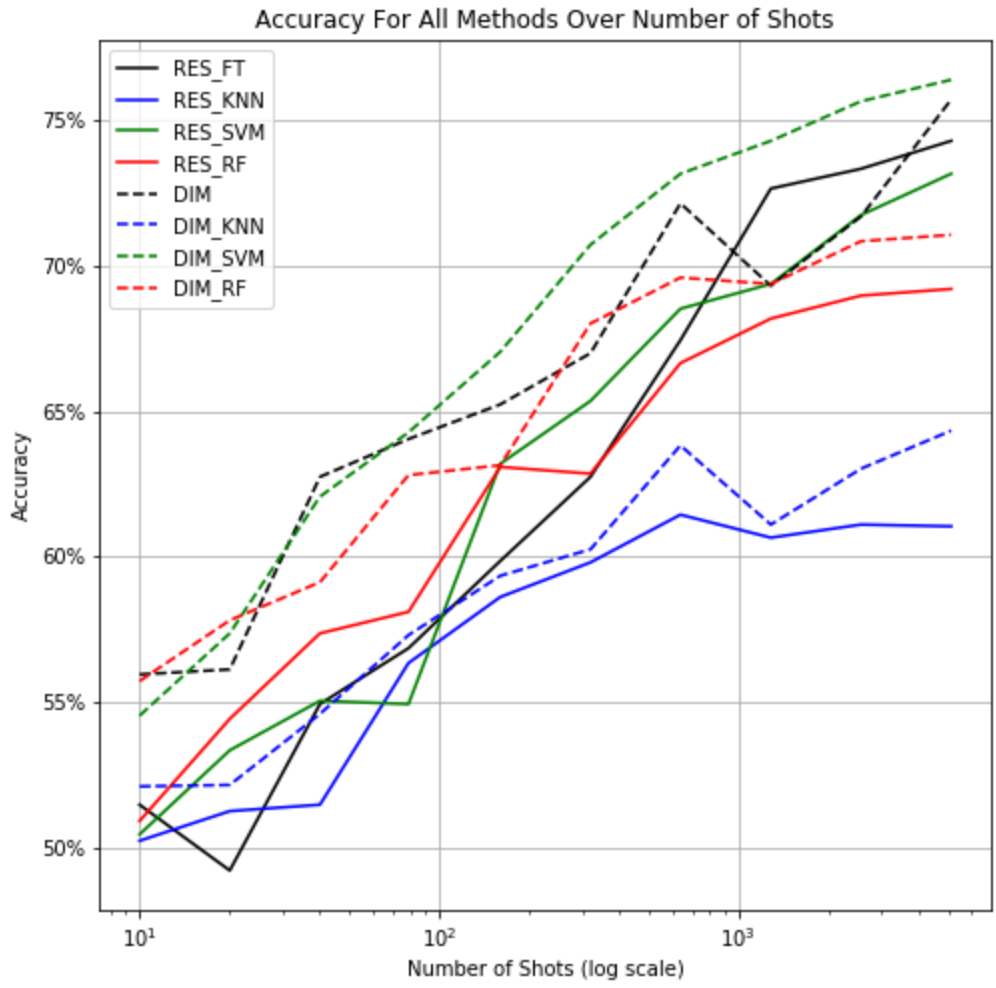

**eFigure 1.** Accuracy for All Methods and Number of Shots

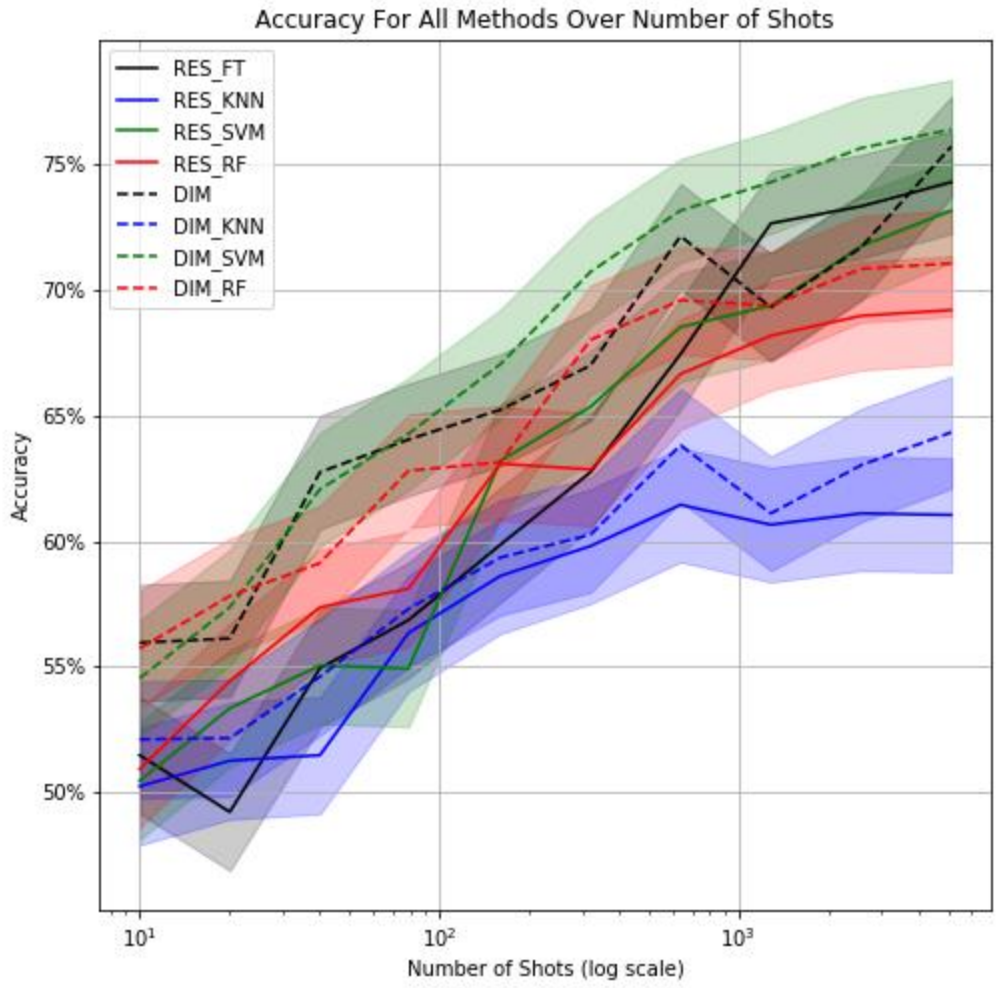

**eFigure 2.** Accuracy and Confidence Intervals for All Shots

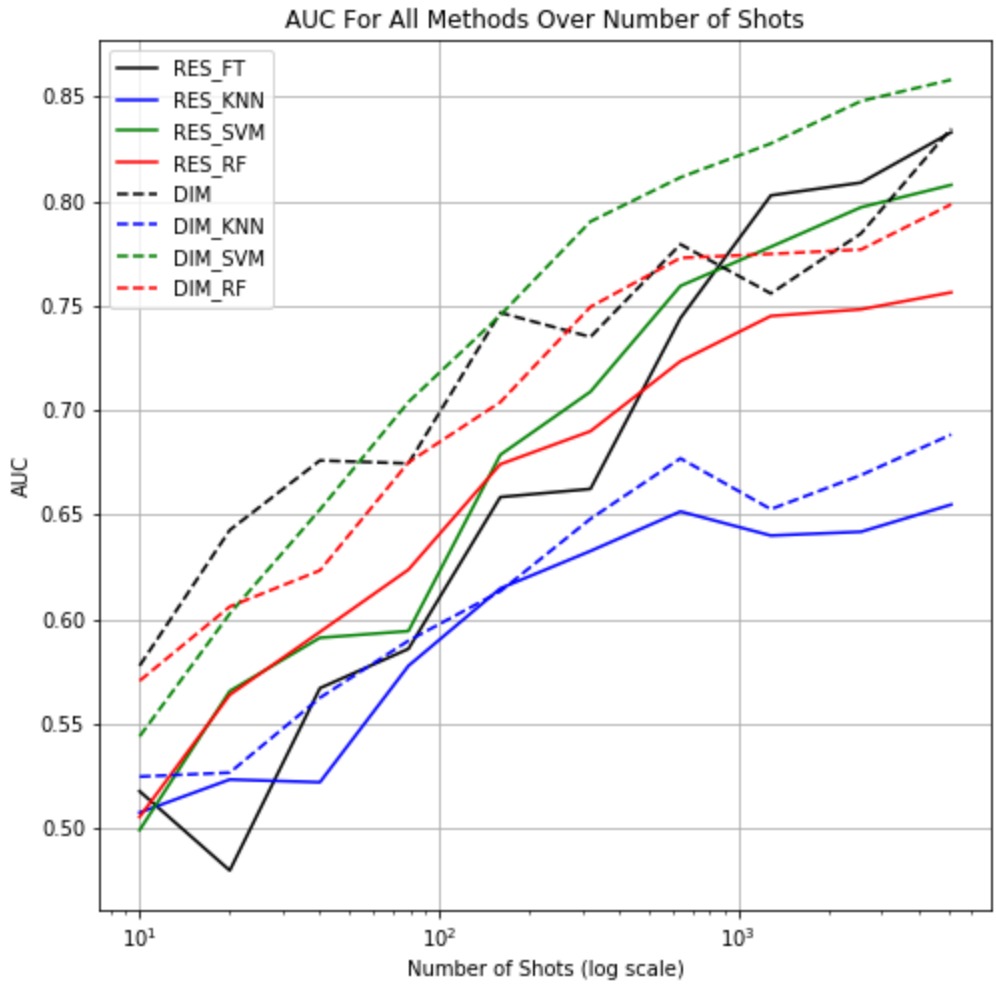

**eFigure 3.** ROC AUC for All Shots



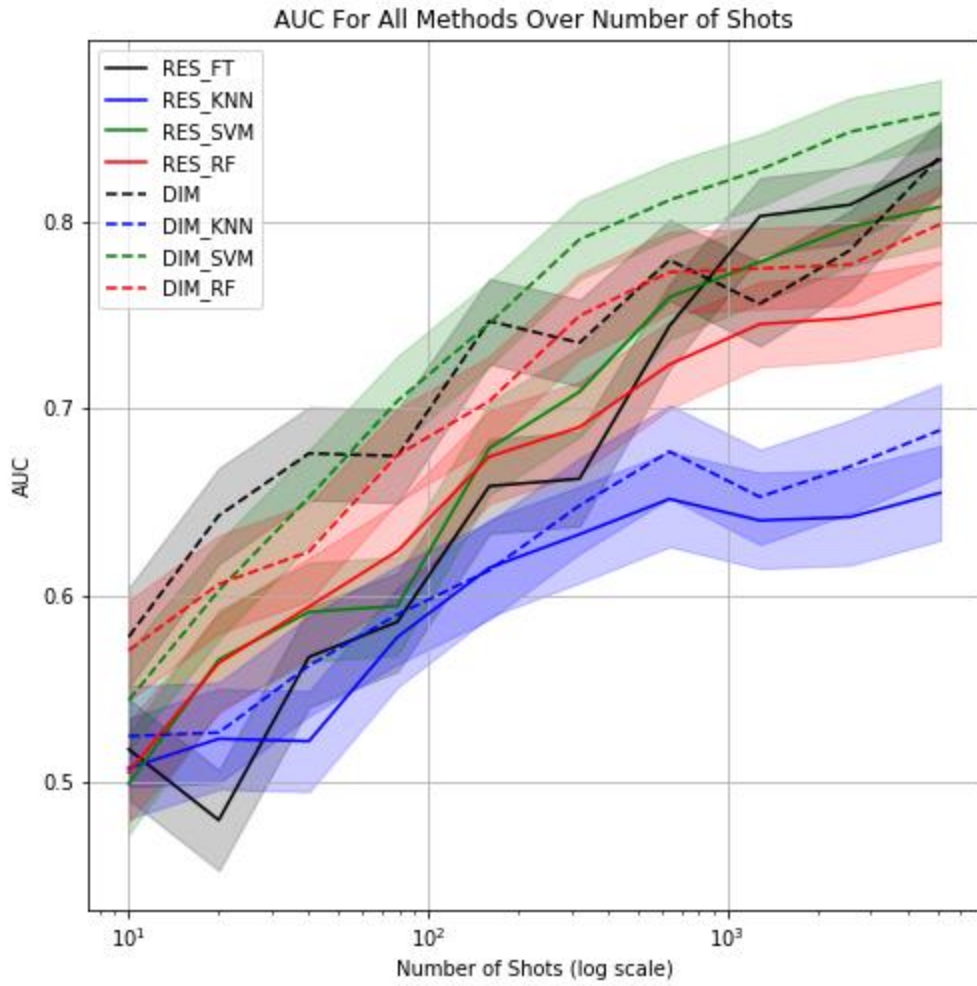

**eFigure 4.** ROC AUC for All Shots

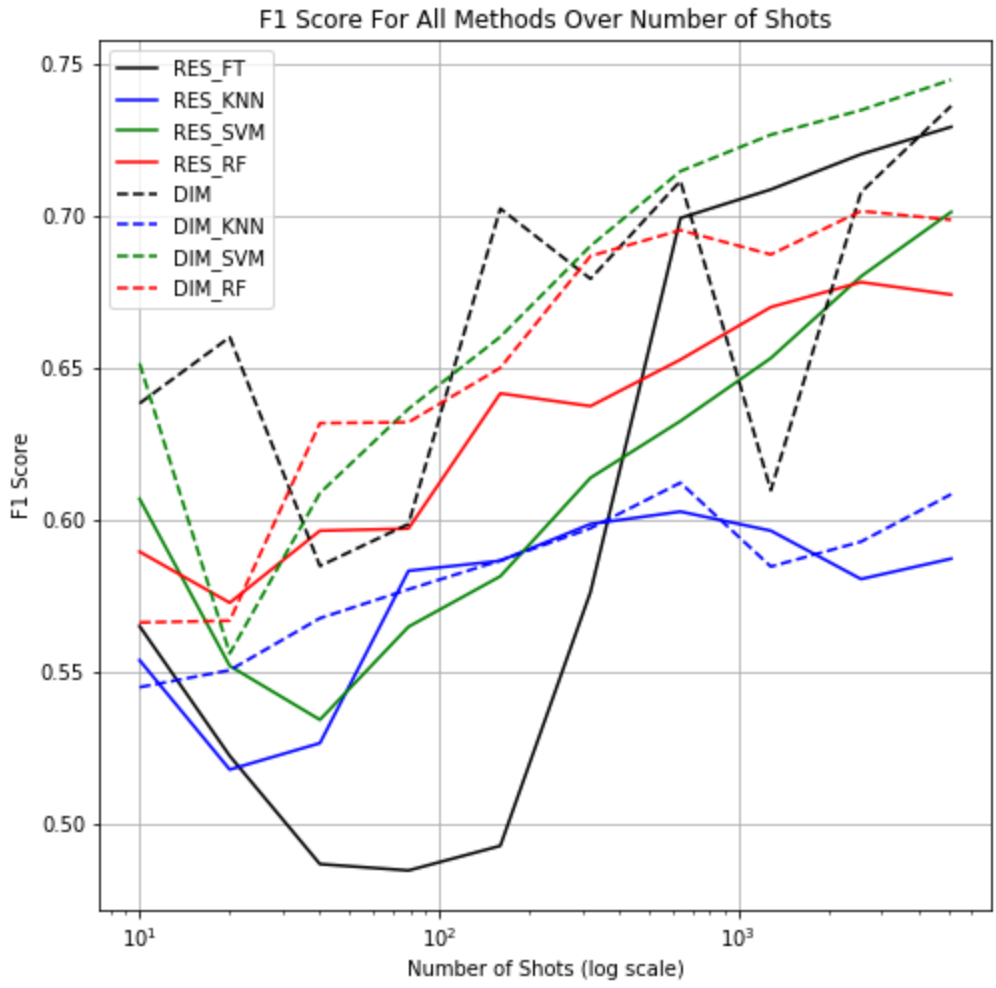

eFigure 5. F1 Score for All Shots

### Receiver Operating Characteristic Curve for all Methods-10 Shots

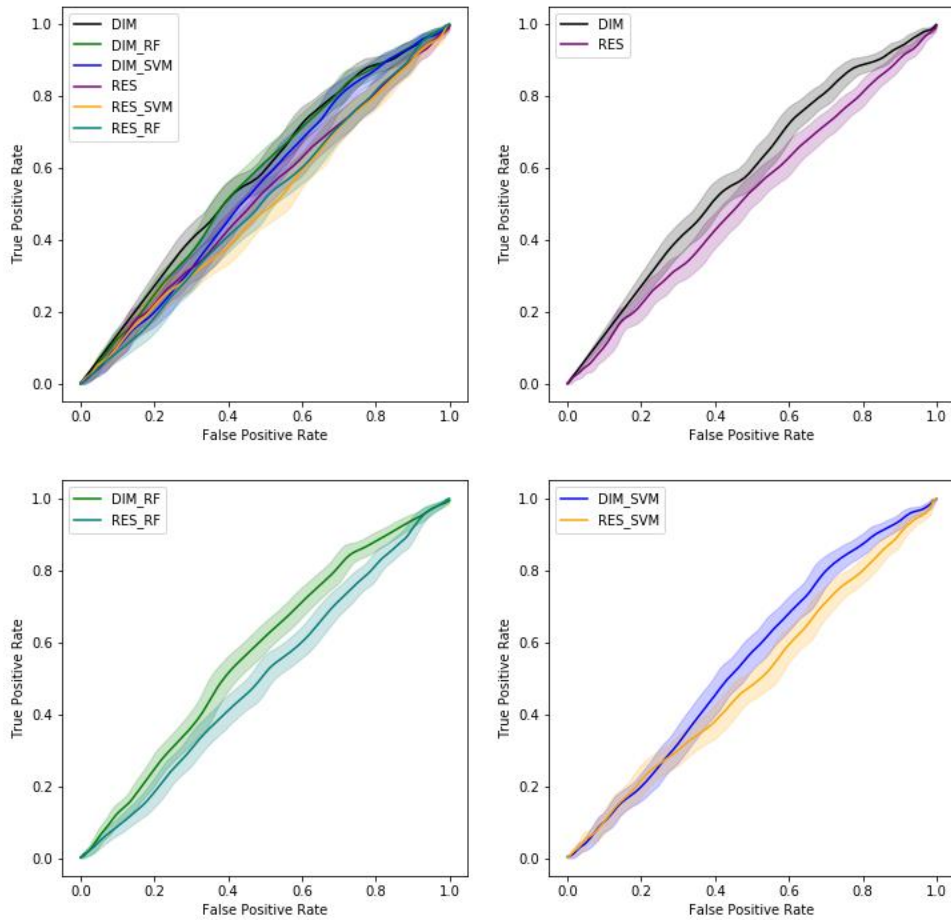

**eFigure 6.** N=10 Shots Results: ROCs and Confidence Intervals, (upper left) All, (rest) Two-Curve Comparisons of Methods

### Receiver Operating Characteristic Curve for all Methods-40 Shots

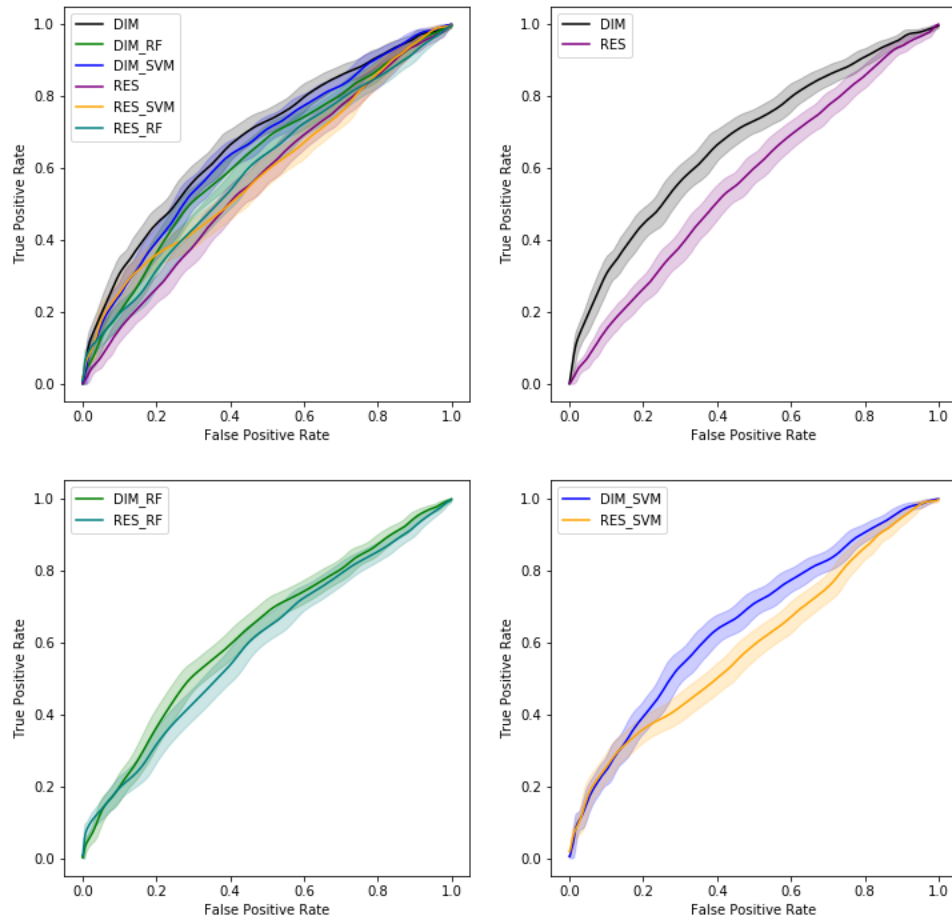

**eFigure 7.** N=40 Shots Results: ROCs and Confidence Intervals, (upper left) All Methods, (rest) Two by Two Comparison of Methods

### Receiver Operating Characteristic Curve for all Methods-160 Shots

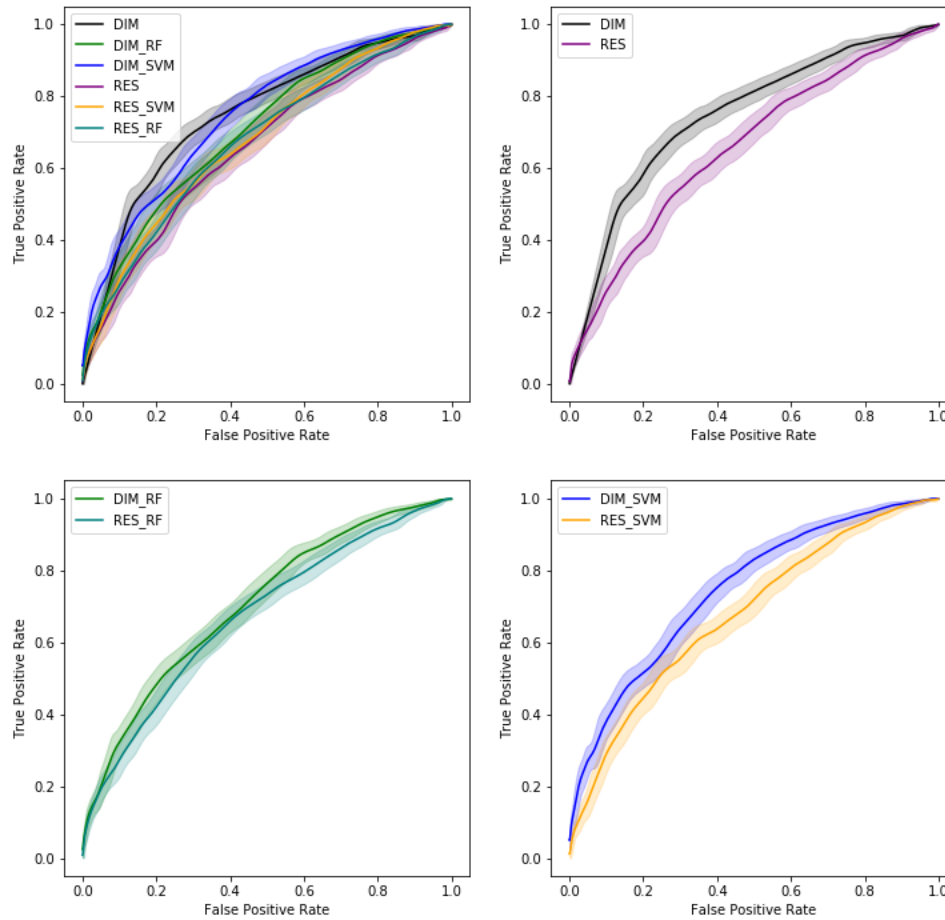

**eFigure 8.** N=160 Shots Results: ROCs and Confidence Intervals, (upper left) All Methods, (rest) Two by Two Comparison of Methods

### Receiver Operating Characteristic Curve for all Methods-5120 Shots

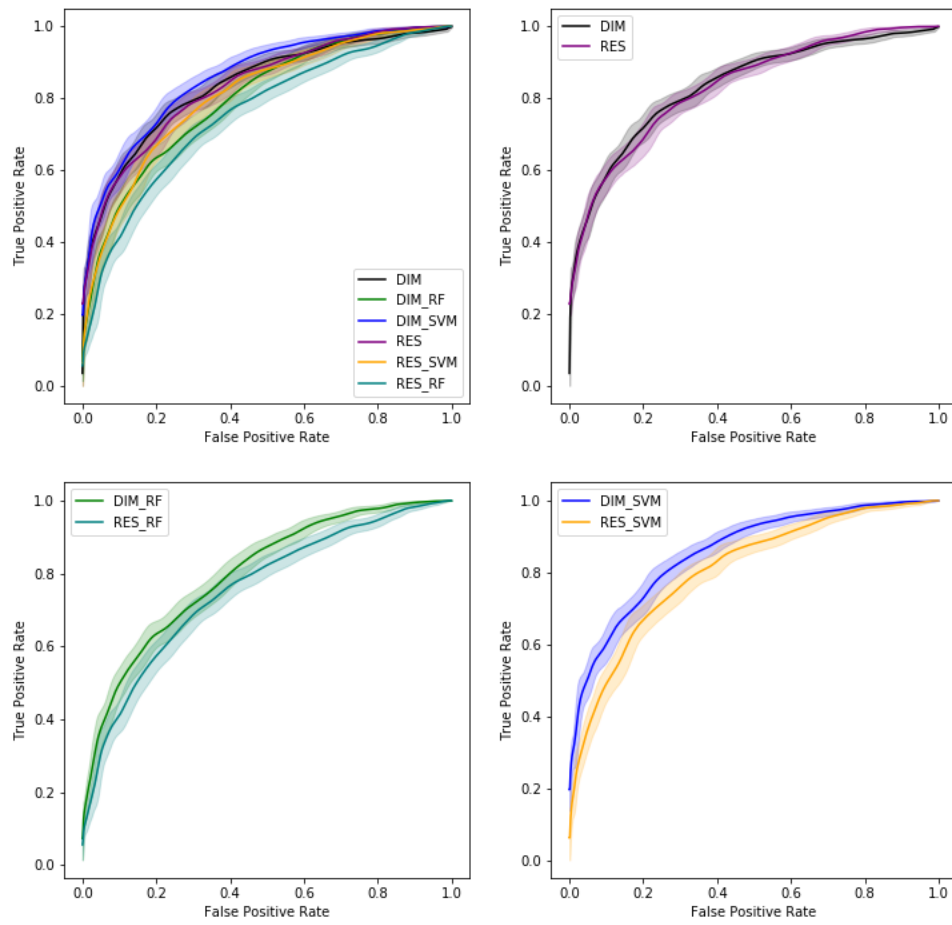

**eFigure 9.** N=5120 Shots Results: ROCs and Confidence Intervals, (upper left) All Methods, (rest) Two by Two Comparison of Methods

Precision Recall Curve for all Methods-10 Shots

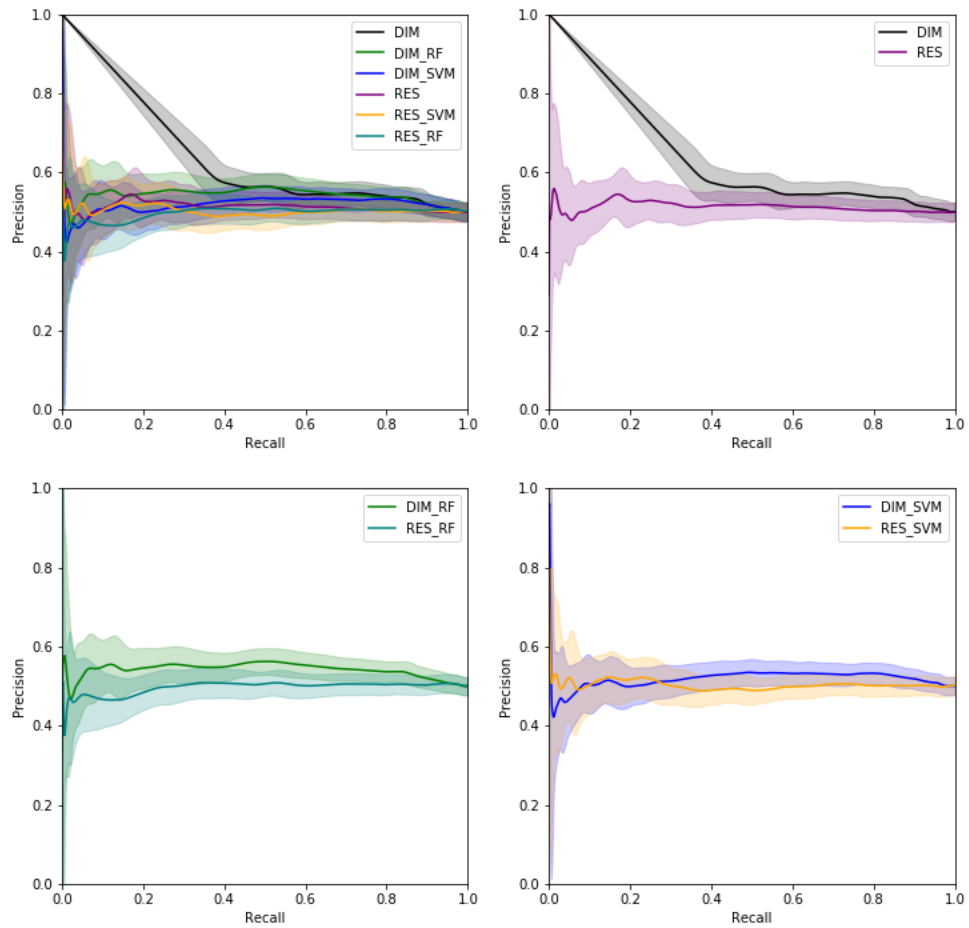

**eFigure 10.** N=10 Shots Results: PR Curves and Confidence Intervals, (upper left) All Methods, (rest) Two by Two Comparison of Methods

Precision Recall Curve for all Methods-40 Shots

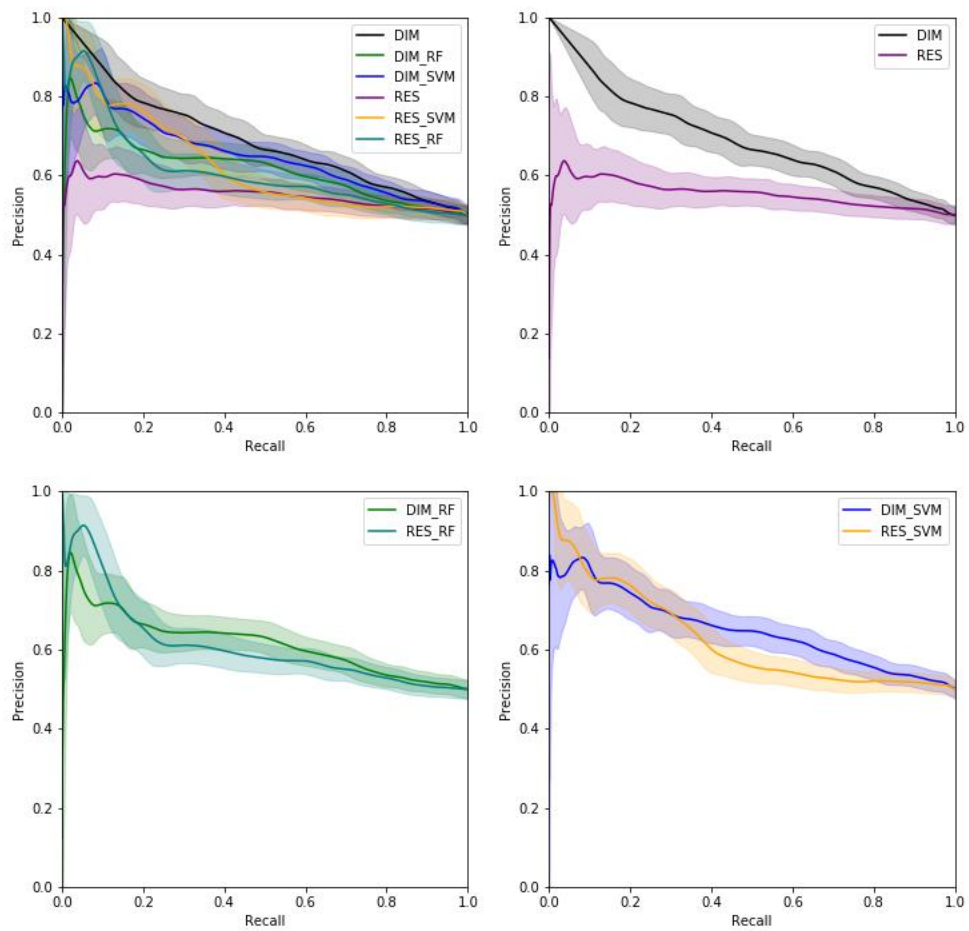

**eFigure 11.** N=40 Shots Results: PR Curves and Confidence Intervals, (upper left) All Methods, (rest) Two by Two Comparison of Methods



Precision Recall Curve for all Methods-160 Shots

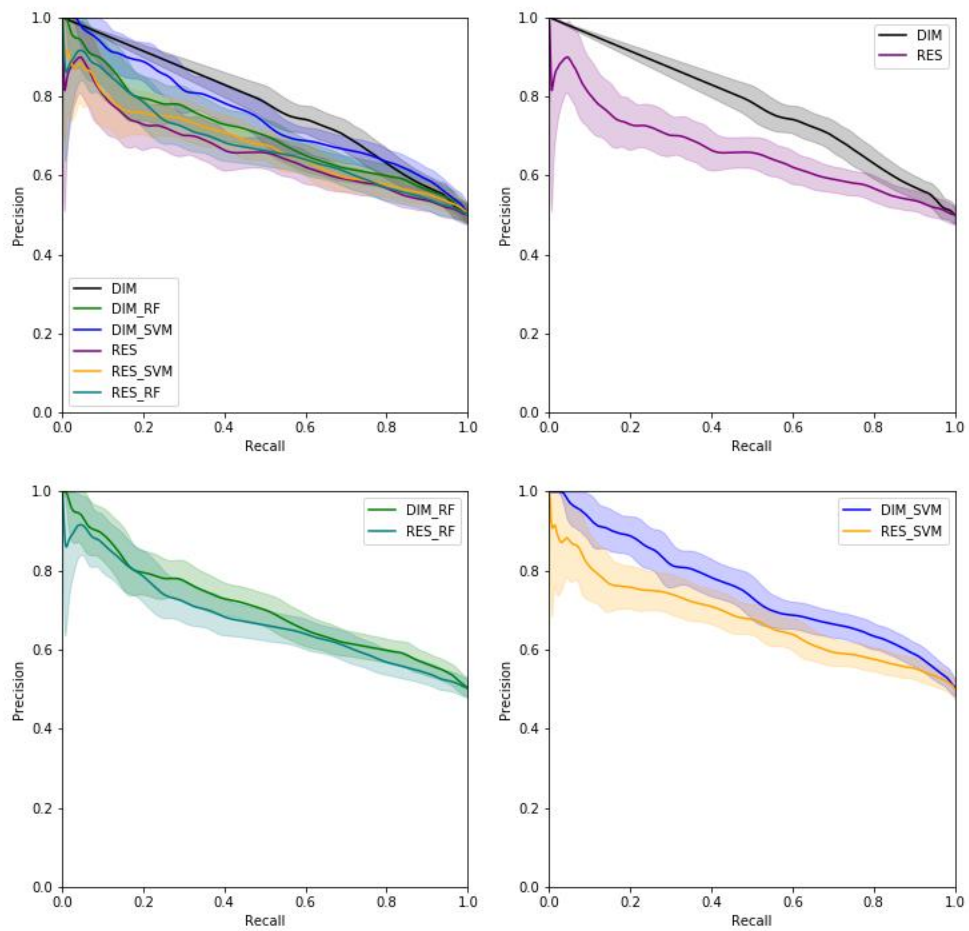

**eFigure 12.** N=160 Shots Results: PR Curves and Confidence Intervals, (upper left) All Methods, (rest) Two by Two Comparison of Methods

Precision Recall Curve for all Methods-5120 Shots

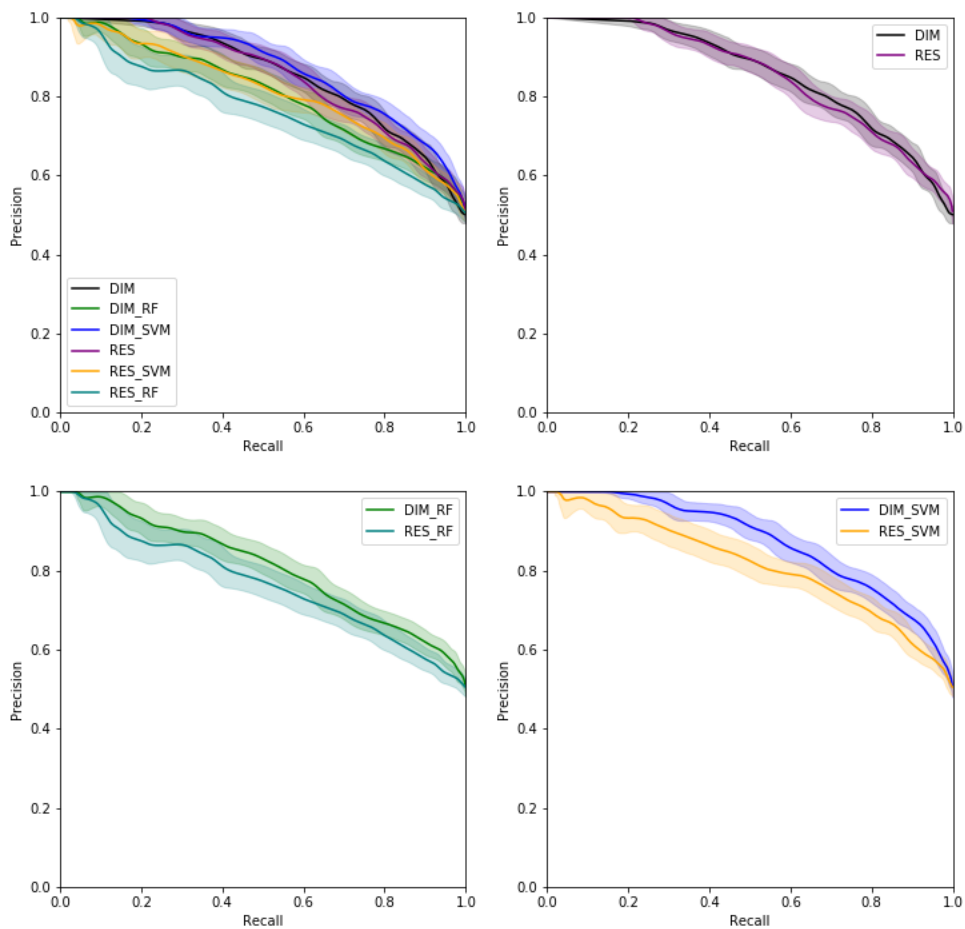

**eFigure 13.** N=5120 Shots Results: PR Curves and Confidence Intervals, (upper left) All Methods, (rest) Two by Two Comparison of Methods
